# Supplementary material for: Development of a microfluidic dispensing device for multivariate data acquisition and application in molecularly imprinting hydrogel preparation
Source: Royal Society of Chemistry journal article supplement (doi:10.1039/d2tb00685e), 2022-01-01
Supplement: d2tb00685e1.pdf [file d2tb00685e1.pdf]

## Supporting information

# Development of a microfluidic dispensing device for multivariate data acquisition and application in molecularly imprinting hydrogel preparation

Yanawut Manmana,<sup>a</sup> Nobuyuki Hiraoka,<sup>a</sup> Toyohiro Naito,<sup>a,b</sup> Takuya Kubo,<sup>a\*</sup> Koji Otsuka<sup>a</sup>

<sup>a</sup> *Department of Material Chemistry, Graduate School of Engineering, Kyoto University, Nishikyo-ku, Kyoto 615-8510, Japan*

<sup>b</sup> *Department of Applied Chemistry, Graduate School of Engineering, Kyushu University, Nishiku, Fukuoka 819-0395, Japan*

\*Corresponding author: Takuya Kubo

Tel: +81-75-383-2448

Fax: +81-75-383-2450

E-mail: kubo.takuya.6c@kyoto-u.ac.jp

## Table of Contents

Table S1 Composition of MIP hydrogel #1-32

Table S2 Composition of MIP hydrogel #33-56

Table S3 Composition of MIP hydrogel #57-77

Figure 1S Adsorption performance toward lysozyme and trypsin of MIP hydrogel #1-77

**Table S1** Composition of MIP hydrogel #1-32.

| Gel # | AMPS<br>( $\mu\text{mol}$ ) | AIYP<br>(wt.% vs<br>14G) | Cross-linker, template, solvent |
|-------|-----------------------------|--------------------------|---------------------------------|
| 1     |                             | 0.58                     |                                 |
| 2     |                             | 1.2                      |                                 |
| 3     |                             | 1.5                      |                                 |
| 4     |                             | 2.1                      |                                 |
| 5     | 1.9                         | 2.6                      |                                 |
| 6     |                             | 3.0                      |                                 |
| 7     |                             | 5.4                      |                                 |
| 8     |                             | 6.7                      |                                 |
| 9     |                             | 0.58                     |                                 |
| 10    |                             | 1.2                      |                                 |
| 11    |                             | 1.5                      |                                 |
| 12    | 3.9                         | 2.1                      |                                 |
| 13    |                             | 2.6                      |                                 |
| 14    |                             | 3.0                      |                                 |
| 15    |                             | 5.4                      |                                 |
| 16    |                             | 6.7                      |                                 |
| 17    |                             | 0.58                     |                                 |
| 18    |                             | 1.2                      |                                 |
| 19    |                             | 1.5                      |                                 |
| 20    |                             | 2.1                      |                                 |
| 21    | 6.9                         | 2.6                      |                                 |
| 22    |                             | 3.0                      |                                 |
| 23    |                             | 5.4                      |                                 |
| 24    |                             | 6.7                      |                                 |
| 25    |                             | 0.58                     |                                 |
| 26    |                             | 1.2                      |                                 |
| 27    |                             | 1.5                      |                                 |
| 28    | 8.6                         | 2.1                      |                                 |
| 29    |                             | 2.6                      |                                 |
| 30    |                             | 3.0                      |                                 |
| 31    |                             | 5.4                      |                                 |
| 32    |                             | 6.7                      |                                 |

14G, 80.7  $\mu\text{mol}$ ;  
Lysozyme, 0.38  $\mu\text{mol}$ ;  
1.0 mM Tris-HCl buffer (pH 7.0), 1.0 ml

**Table S2** Composition of MIP hydrogel #33-56.

| <b>Gel #</b> | <b>AMPS<br/>(<math>\mu\text{mol}</math>)</b> | <b>SS<br/>(<math>\mu\text{mol}</math>)</b> | <b>AS<br/>(<math>\mu\text{mol}</math>)</b> | <b>Cross-linker, initiator, template,<br/>solvent</b>                                                                                 |
|--------------|----------------------------------------------|--------------------------------------------|--------------------------------------------|---------------------------------------------------------------------------------------------------------------------------------------|
| 33           | 6.8                                          |                                            |                                            | 14G, 80.7 $\mu\text{mol}$ ;<br>AIYP, 2.5 wt.% vs. 14G;<br>Lysozyme, 0.38 $\mu\text{mol}$ ;<br>1.0 mM Tris-HCl buffer (pH 7.0), 1.0 ml |
| 34           |                                              | 6.8                                        |                                            |                                                                                                                                       |
| 35           |                                              |                                            | 6.8                                        |                                                                                                                                       |
| 36           | 2.0                                          | 4.8                                        |                                            |                                                                                                                                       |
| 37           | 2.6                                          | 4.3                                        |                                            |                                                                                                                                       |
| 38           | 2.8                                          | 4.0                                        |                                            |                                                                                                                                       |
| 39           | 3.4                                          | 3.4                                        |                                            |                                                                                                                                       |
| 40           | 4.0                                          | 2.8                                        |                                            |                                                                                                                                       |
| 41           | 4.3                                          | 2.6                                        |                                            |                                                                                                                                       |
| 42           | 4.8                                          | 2.0                                        |                                            |                                                                                                                                       |
| 43           | 2.0                                          |                                            | 4.8                                        |                                                                                                                                       |
| 44           | 2.6                                          |                                            | 4.3                                        |                                                                                                                                       |
| 45           | 2.8                                          |                                            | 4.0                                        |                                                                                                                                       |
| 46           | 3.4                                          |                                            | 3.4                                        |                                                                                                                                       |
| 47           | 4.0                                          |                                            | 2.8                                        |                                                                                                                                       |
| 48           | 4.3                                          |                                            | 2.6                                        |                                                                                                                                       |
| 49           | 4.8                                          |                                            | 2.0                                        |                                                                                                                                       |
| 50           |                                              | 4.8                                        | 2.0                                        |                                                                                                                                       |
| 51           |                                              | 4.3                                        | 2.6                                        |                                                                                                                                       |
| 52           |                                              | 4.0                                        | 2.8                                        |                                                                                                                                       |
| 53           |                                              | 3.4                                        | 3.4                                        |                                                                                                                                       |
| 54           |                                              | 2.8                                        | 4.0                                        |                                                                                                                                       |
| 55           |                                              | 2.6                                        | 4.3                                        |                                                                                                                                       |
| 56           |                                              | 2.0                                        | 4.8                                        |                                                                                                                                       |

**Table S3** Composition of MIP hydrogel #57-77.

| <b>Gel #</b> | <b>AMPS<br/>(<math>\mu\text{mol}</math>)</b> | <b>SS<br/>(<math>\mu\text{mol}</math>)</b> | <b>AS<br/>(<math>\mu\text{mol}</math>)</b> | <b>Cross-linker, initiator, template, solvent</b>                                                                                     |
|--------------|----------------------------------------------|--------------------------------------------|--------------------------------------------|---------------------------------------------------------------------------------------------------------------------------------------|
| 57           | 6.8                                          |                                            |                                            | 14G, 80.7 $\mu\text{mol}$ ;<br>AIYP, 1.0 wt.% vs. 14G;<br>Lysozyme, 0.38 $\mu\text{mol}$ ;<br>1.0 mM Tris-HCl buffer (pH 7.0), 1.0 ml |
| 58           |                                              | 6.8                                        |                                            |                                                                                                                                       |
| 59           |                                              |                                            | 6.8                                        |                                                                                                                                       |
| 60           | 5.3                                          | 1.5                                        |                                            |                                                                                                                                       |
| 61           | 4.7                                          | 2.1                                        |                                            |                                                                                                                                       |
| 62           | 3.6                                          | 3.2                                        |                                            |                                                                                                                                       |
| 63           | 3.2                                          | 3.6                                        |                                            |                                                                                                                                       |
| 64           | 2.1                                          | 4.7                                        |                                            |                                                                                                                                       |
| 65           | 1.5                                          | 5.3                                        |                                            |                                                                                                                                       |
| 66           |                                              | 5.3                                        | 1.5                                        |                                                                                                                                       |
| 67           |                                              | 4.7                                        | 2.1                                        |                                                                                                                                       |
| 68           |                                              | 3.6                                        | 3.2                                        |                                                                                                                                       |
| 69           |                                              | 3.2                                        | 3.6                                        |                                                                                                                                       |
| 70           |                                              | 2.1                                        | 4.7                                        |                                                                                                                                       |
| 71           |                                              | 1.5                                        | 5.3                                        |                                                                                                                                       |
| 72           | 1.5                                          |                                            | 5.3                                        |                                                                                                                                       |
| 73           | 2.1                                          |                                            | 4.7                                        |                                                                                                                                       |
| 74           | 3.2                                          |                                            | 3.6                                        |                                                                                                                                       |
| 75           | 3.6                                          |                                            | 3.2                                        |                                                                                                                                       |
| 76           | 4.7                                          |                                            | 2.1                                        |                                                                                                                                       |
| 77           | 5.3                                          |                                            | 1.5                                        |                                                                                                                                       |

a)

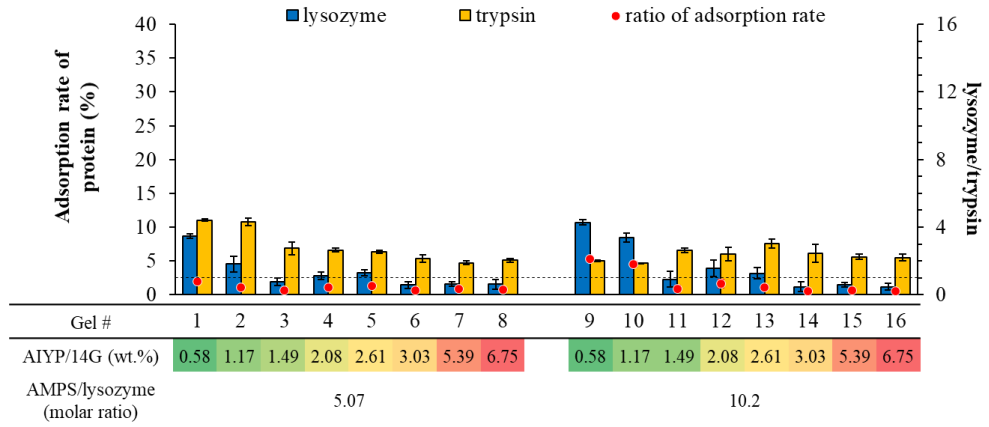

b)

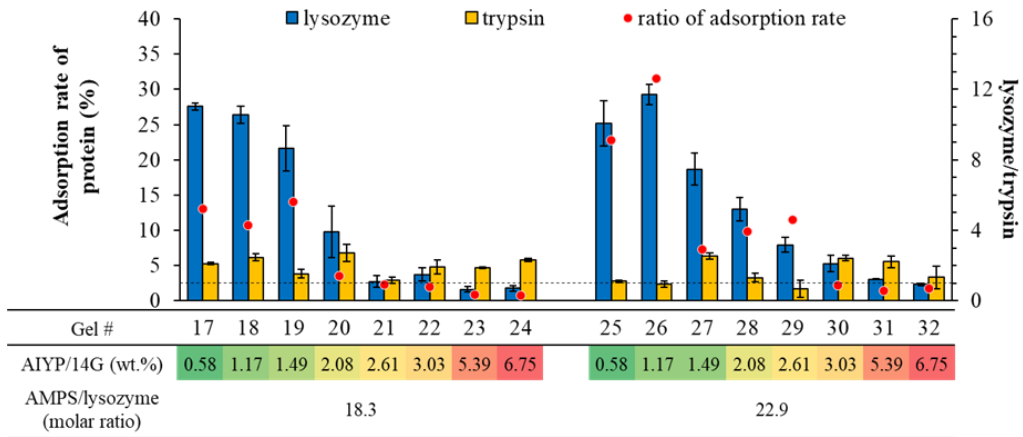

c)

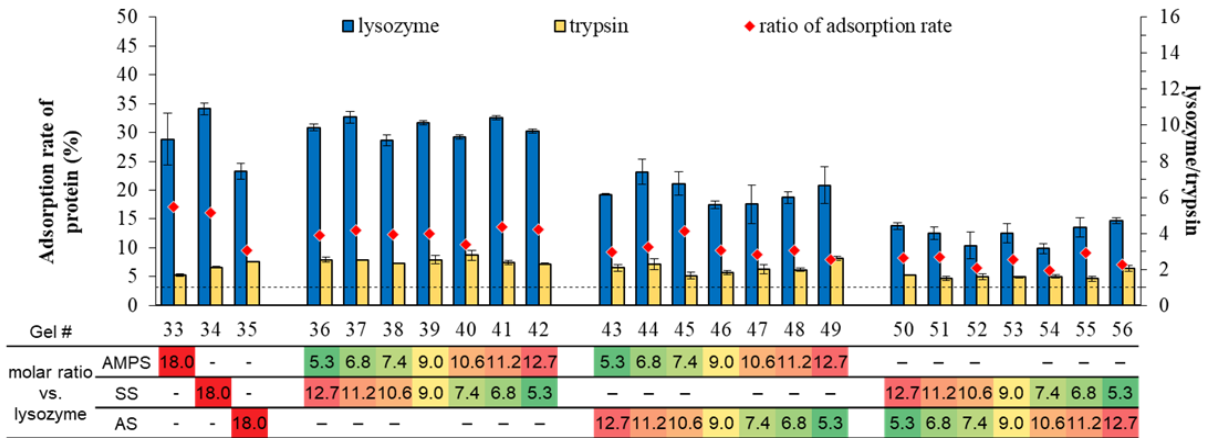

d)

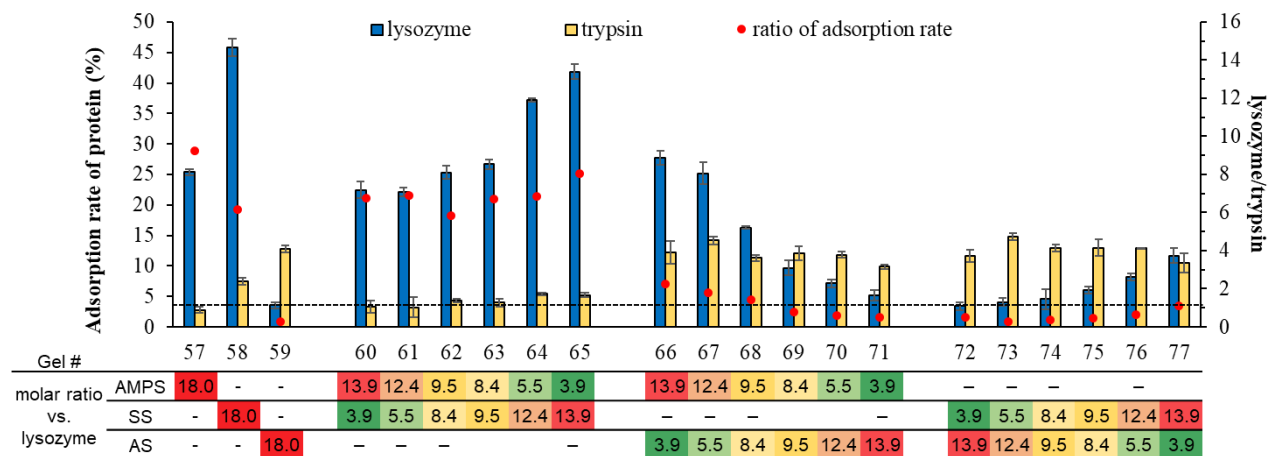

**Figure 1S** Adsorption performance toward lysozyme and trypsin of MIP hydrogels #1-77. Adsorption condition: gel size, 100  $\mu$ L; solution volume, 2.5 mL; concentration of protein, 0.02 mM; concentration of NaCl, 50 mM; solvent, 1.0 mM Tris-HCl buffer (pH 7.1).

HPLC condition for protein measurement

HPLC system: LC-40B X3

Detection wavelength: 210 nm

Column: Aeris widepore XB-C8, 3.6  $\mu$ m, 150mm x 2.1 mm

Mobile phase A: 0.1% TFA in H<sub>2</sub>O; Mobile phase B: 0.1% TFA in ACN

Gradient: 0-1 min 10% B, 1-3 min 30% B, 3-15 min 55% B, 15-18 min 90% B, 18-25 min 10% B

Flow rate: 0.2 mL/min; Temperature: 75  $^{\circ}$ C; Sample injection: 10  $\mu$ L
